# Supplementary material
Source: Research Square preprint supplement (doi:10.21203/rs.3.rs-9104987/v1)
Supplement: Supplementary file 1 [file a5a4dd8e4e1b6981389fe1fa.pdf]

**A**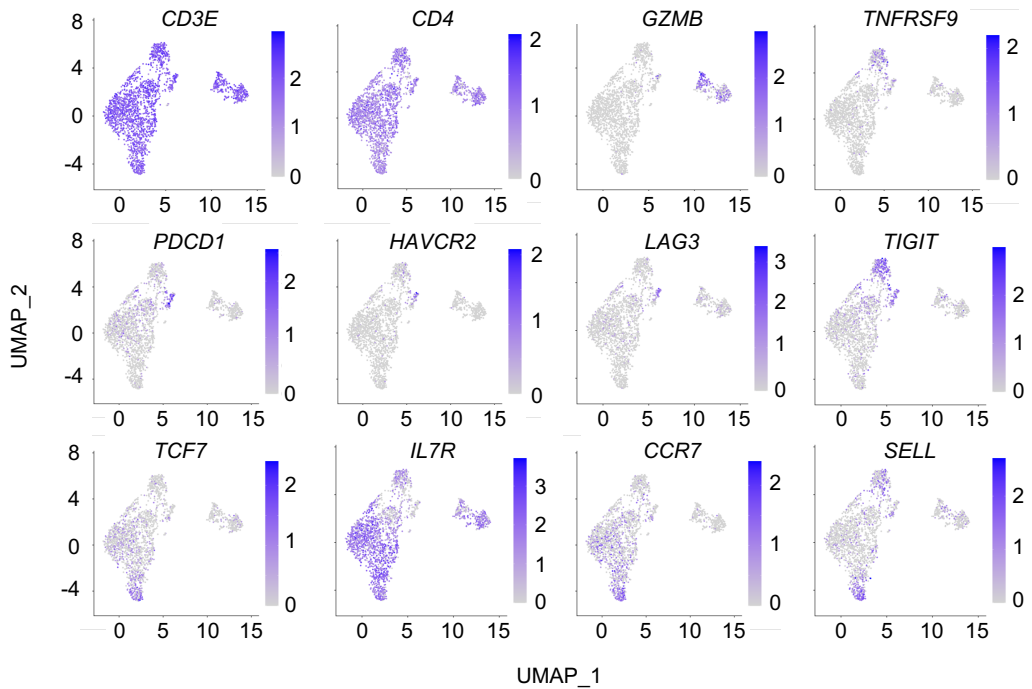**B**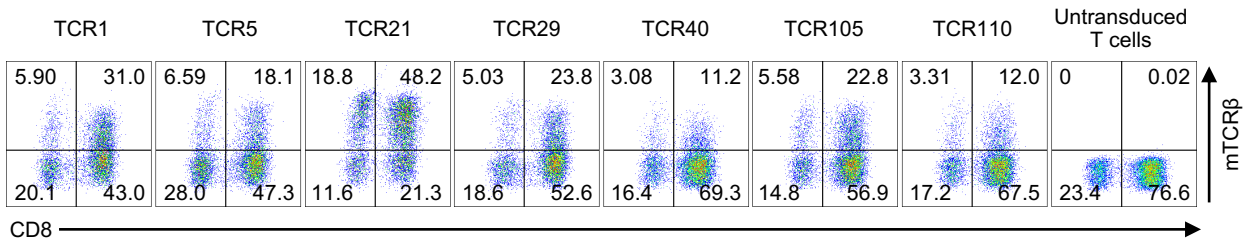

**Supplementary Figure 1. Single-cell transcriptome profiling of CD4<sup>+</sup> TILs in osteosarcoma.**

(A) Feature plots of CD4<sup>+</sup> T cells showing representative marker genes associated with T cell identity, effector function, activation, exhaustion, and memory states.

(B) Representative flow cytometry plots showing the transduction efficiency of TCRs.

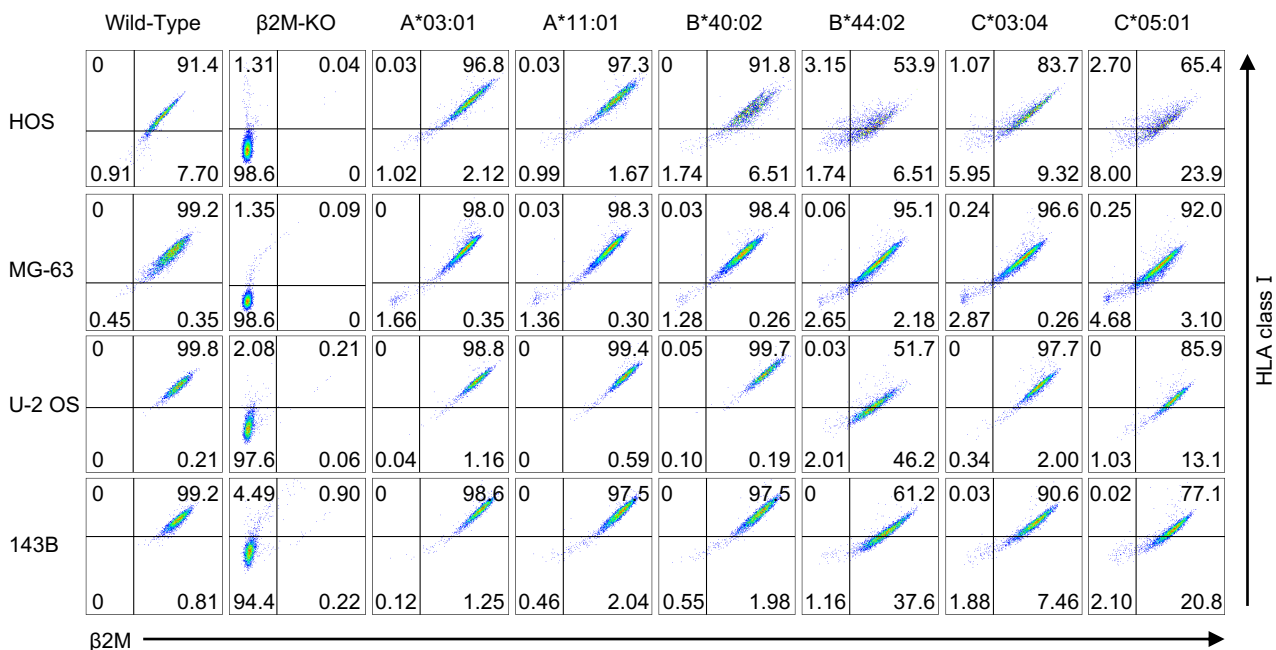

## Supplementary Figure 2. Generation of osteosarcoma cell lines expressing a single HLA class I.

Expression of  $\beta$ 2M and HLA class I in osteosarcoma cell lines transduced with a single HLA class I allele.

**A**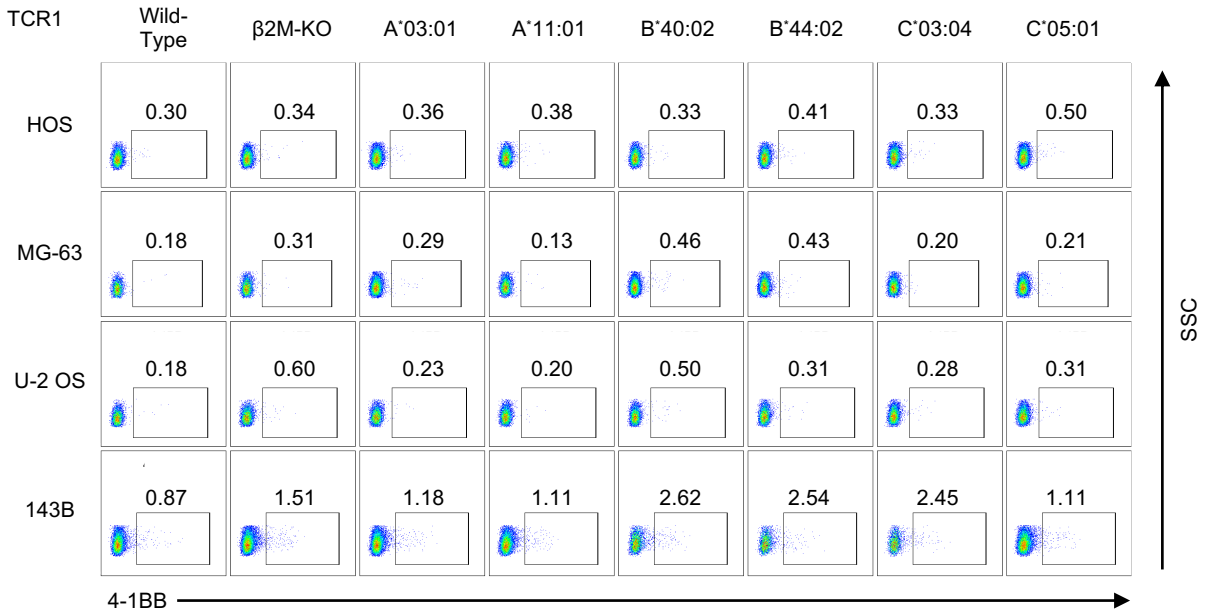**B**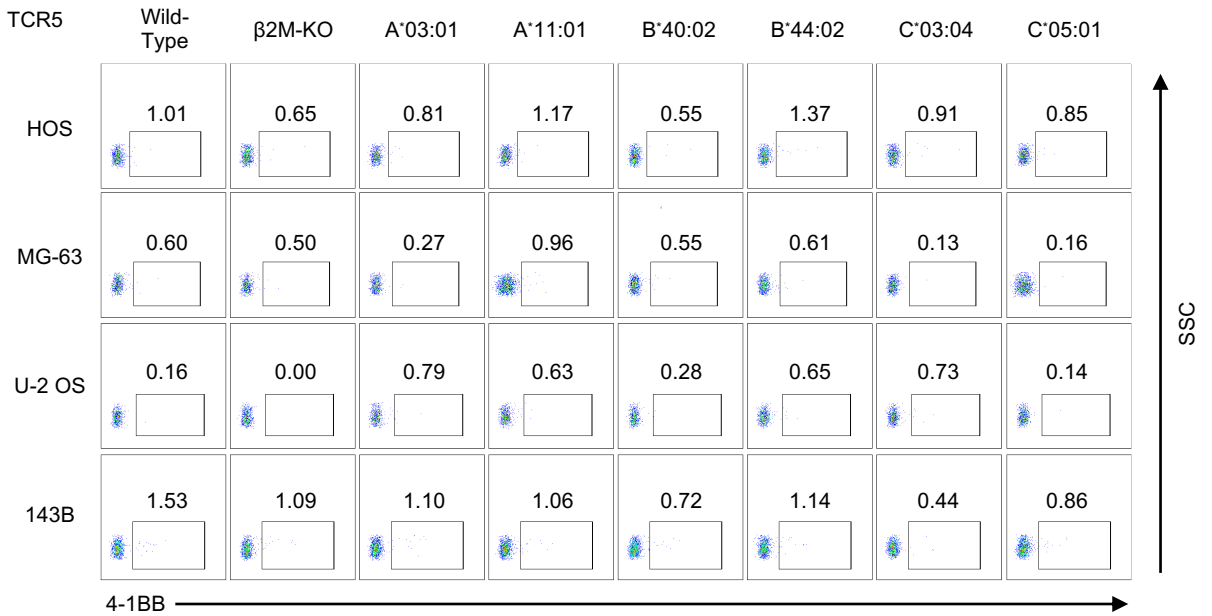

**C**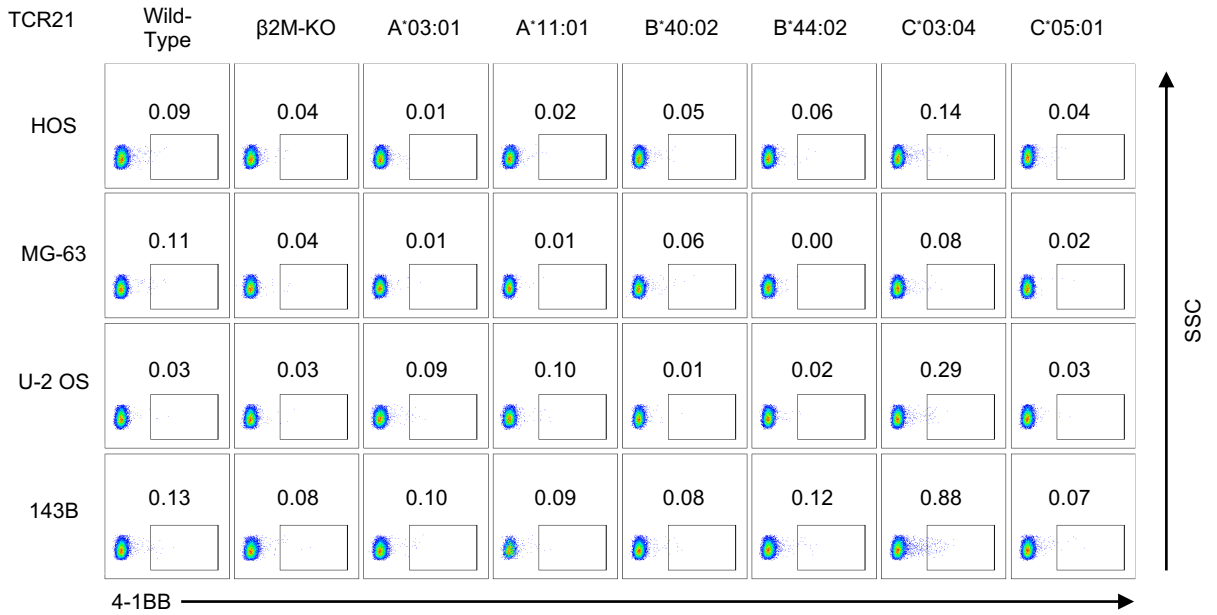**D**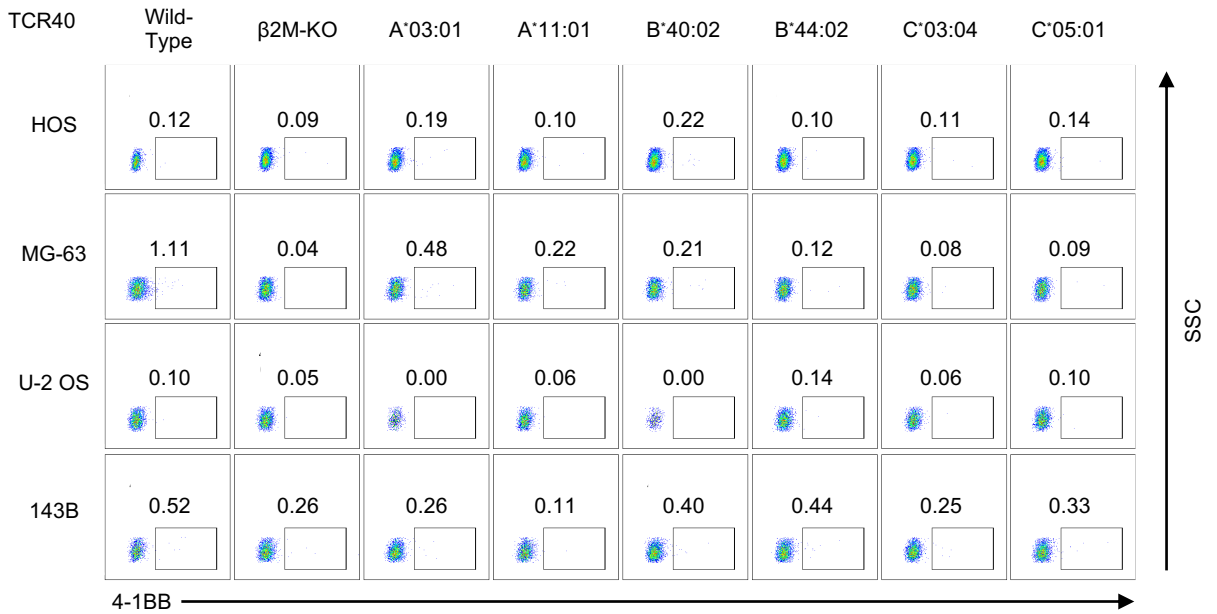

**E**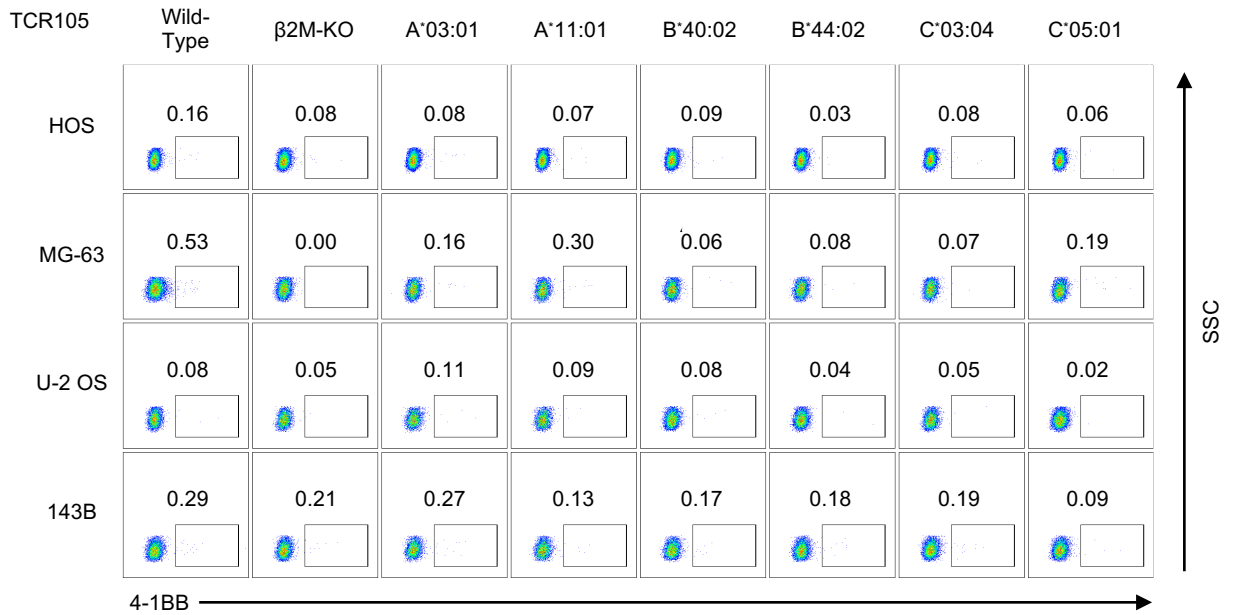**F**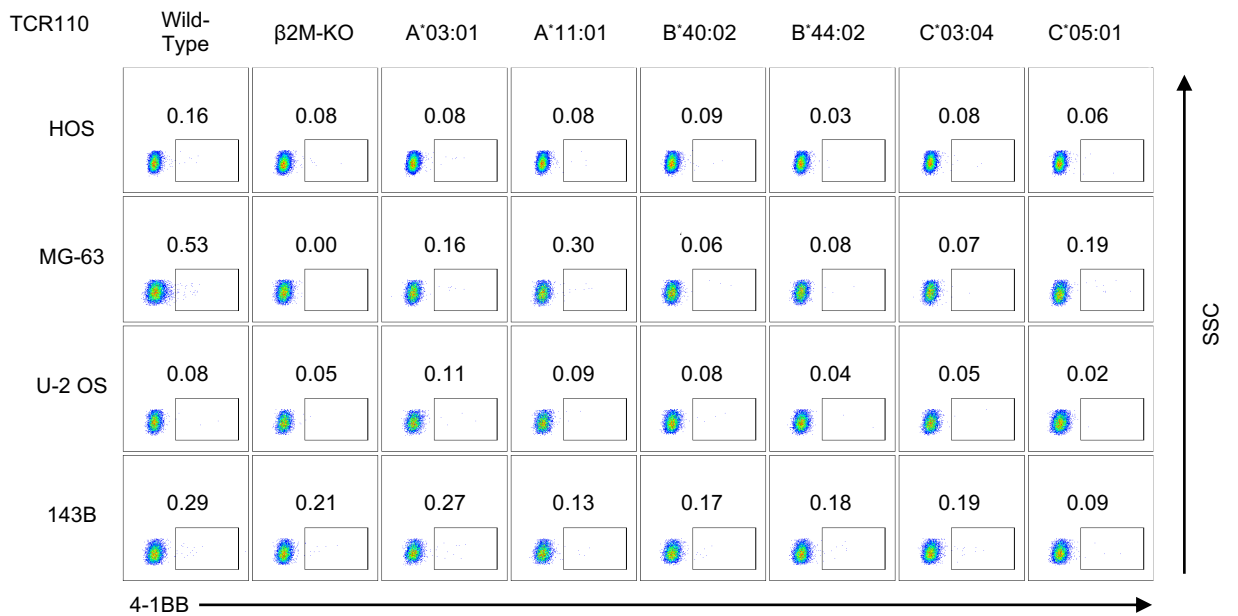

**Supplementary Figure 3. Co-culture assay of TCR-T cells and osteosarcoma cell lines.**

(A–F) Representative flow cytometry plots showing 4-1BB upregulation in TCR-T cells following co-culture with osteosarcoma cell lines. TCR1 (A), TCR5 (B), TCR21 (C), TCR40 (D), TCR105 (E), and TCR110 (F) were co-cultured with wild-type,  $\beta$ 2M-KO, or the indicated monoallelic HLA-expressing osteosarcoma cell lines. The percentages indicate the proportion of 4-1BB<sup>+</sup> cells among TCR-T cells. Data are representative of two independent experiments.

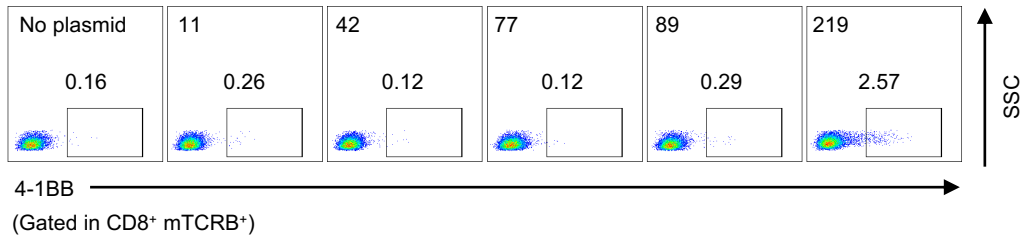

**Supplementary Figure 4. Flow cytometric analysis of 4-1BB upregulation in cDNA library screening.**

Representative flow cytometry plots showing 4-1BB upregulation in TCR29 co-cultured with 293T/ $\beta$ 2m-KO/B\*40:02 cells transfected with the indicated cDNA library pools. The heatmap shown in Fig. 2B was generated from these flow cytometry data.

**A**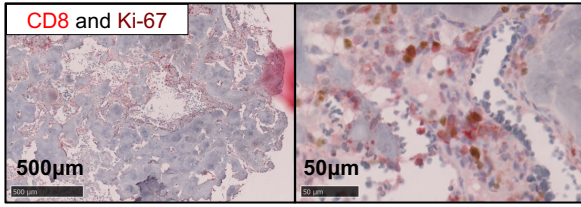**B**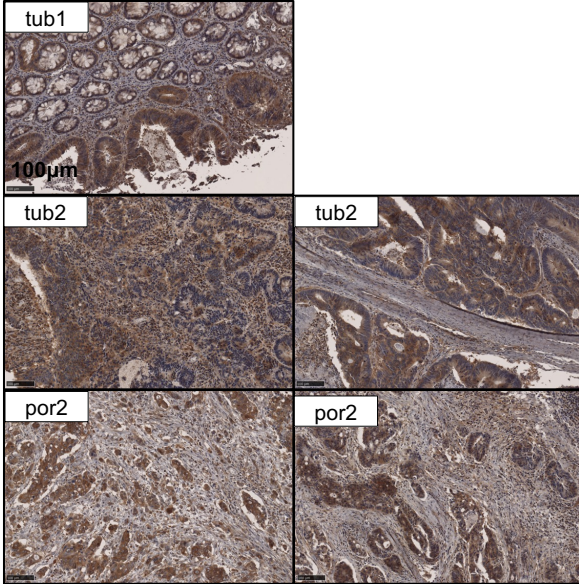**C**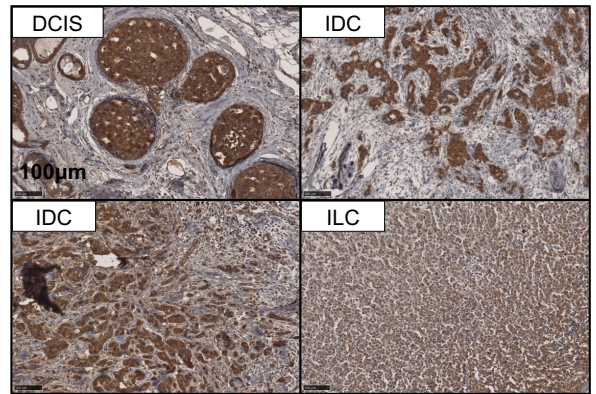**D**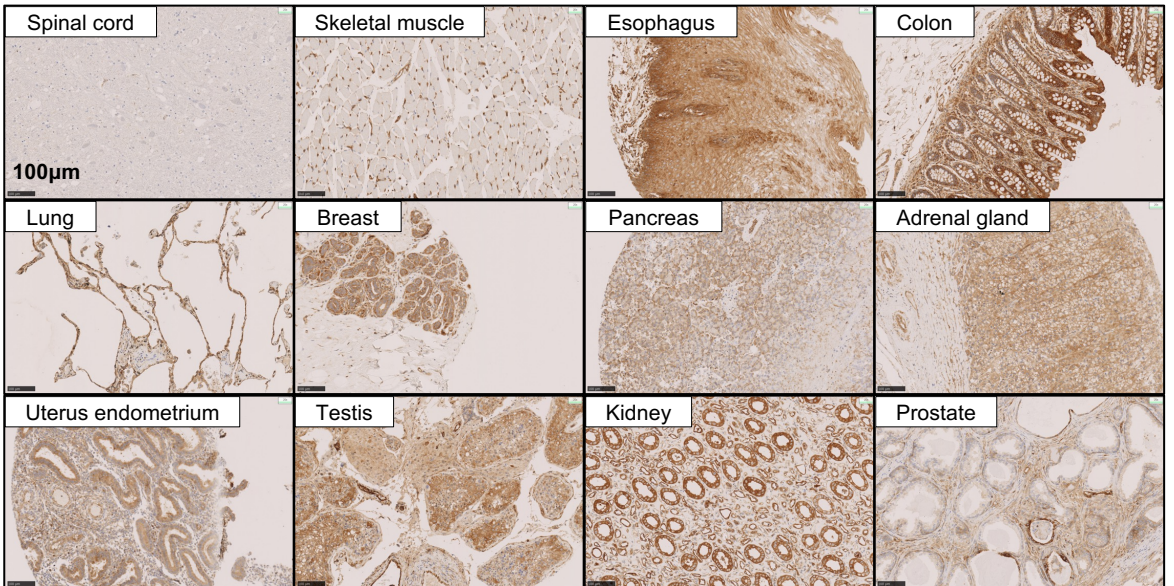

**Supplementary Figure 5. Immunohistochemical analysis of calpain-2 in normal and cancer tissues.**

**(A)** CD8 and Ki-67 double immunohistochemical staining in osteosarcoma specimens.

**(B)** Calpain-2 staining in colon cancer tissues of different histological subtypes: tub1 (well-differentiated tubular adenocarcinoma), tub2 (moderately differentiated tubular adenocarcinoma), and por2 (non-solid-type poorly differentiated adenocarcinoma).

**(C)** Calpain-2 staining in breast cancer tissues of different histological subtypes: DCIS (ductal carcinoma in situ), IDC (invasive ductal carcinoma), and ILC (invasive lobular carcinoma).

**(D)** Calpain-2 immunohistochemical staining in normal tissues.

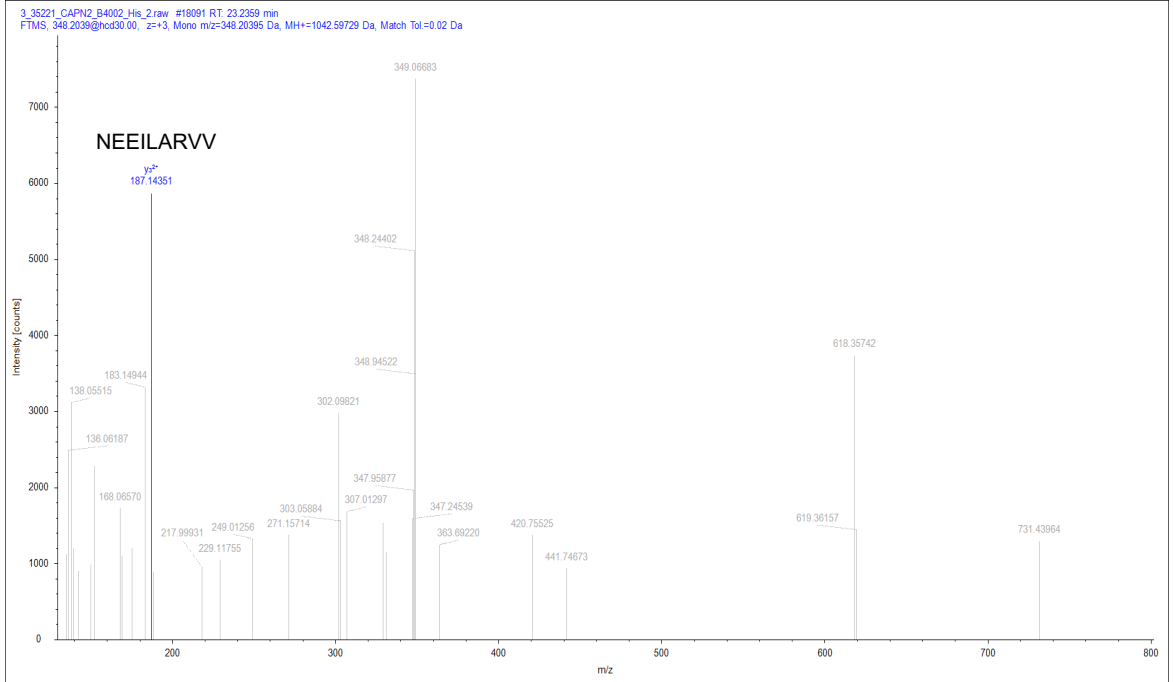

**Supplementary Figure 6. MS/MS spectrum of the calpain2-derived peptide.**

Representative MS/MS spectrum of the calpain2-derived peptide

NEEILARVV

identified by LC–MS/MS using higher-energy collisional dissociation (HCD).

Fragment ions corresponding to b and y-ion series are indicated.

**Supplementary Table 1. CDR3 sequences of TCR genes isolated from TILs**

| Clonotype | TRAV    | CDR3 $\alpha$    | TRAJ  | TRBV   | CDR3 $\beta$    | TRBJ   |
|-----------|---------|------------------|-------|--------|-----------------|--------|
| 1         | 35*02   | CAGQAGANNLFF     | 36*01 | 4-2*01 | CASSLAGKNEGGYTF | 1-2*01 |
| 5         | 1-2*01  | CAVMDSNYQLIW     | 33*01 | 28*01  | CASSPPTEVSGAFF  | 1-1*01 |
| 21        | 12-1*01 | CVVRNSGYALNF     | 41*01 | 6-5*01 | CASSYSGGDEQFF   | 2-1*01 |
| 29        | 3*01    | CGFSVNTPLVF      | 9*01  | 19*01  | CASSPGQIGYTF    | 1-2*01 |
| 40        | 3*01    | CAVRDTSGGKLIF    | 23*01 | 7-8*01 | CASKSPGVGYEQYF  | 2-7*01 |
| 105       | 20*02   | CAVQANRGSTLGRLYF | 18*01 | 19*01  | CASSRNRGDYEAF   | 1-1*01 |
| 110       | 12-2*02 | CAVKAYAGNMLTF    | 39*01 | 7-3*01 | CASSLSQGYEQYF   | 2-7*01 |
